# Supplementary material for: Characterization of Glycoproteoforms of Integrins α2 and β1 in Megakaryocytes in the Occurrence of JAK2V617F Mutation-Induced Primary Myelofibrosis
Source: PubMed Central journal article supplement — Mol Cell Proteomics. 2022 Feb 17;21(4):100213. doi: 10.1016/j.mcpro.2022.100213 (PMC8968581; doi:10.1016/j.mcpro.2022.100213), 2022-02-17
Supplement: mmc4.pdf [file mmc4.pdf]

*Supplemental Data for*

**Characterization of Glycoproteoforms of Integrins  $\alpha 2$  and  $\beta 1$  in  
Megakaryocytes in the Occurrence of JAK2V617F Mutation-Induced  
Primary Myelofibrosis**

**Maissa M. Gaye<sup>1,2</sup>, Christina M. Ward<sup>2</sup>, Andrew J. Piasecki<sup>2</sup>, Vanessa L. Stahl<sup>1</sup>, Aikaterini  
Karagianni<sup>2,3</sup>, Catherine E. Costello<sup>1\*</sup>, Katya Ravid<sup>2\*</sup>**

<sup>1</sup>Department of Biochemistry, Center for Biomedical Mass Spectrometry, Boston University  
School of Medicine, Boston, MA, USA

<sup>2</sup>Department of Medicine and Whitaker Cardiovascular Institute, Boston University School of  
Medicine, Boston, MA, USA

<sup>3</sup>Department of Internal Medicine, School of Medicine, University of Crete, Heraklion, Greece

**\*Corresponding author information**

**Catherine E. Costello**

cecmsms@bu.edu

1 - (617) 358-2433

**Katya Ravid**

kraavid@bu.edu

1 - (617) 358-8242

Table of Contents

|                            |        |
|----------------------------|--------|
| Supplemental Figure 1..... | Page 3 |
| Supplemental Figure 2..... | Page 4 |
| Supplemental Figure 3..... | Page 5 |
| Supplemental Figure 4..... | Page 6 |
| Supplemental Figure 5..... | Page 7 |
| Supplemental Figure 6..... | Page 8 |
| Supplemental Tables: ..... | Page 9 |

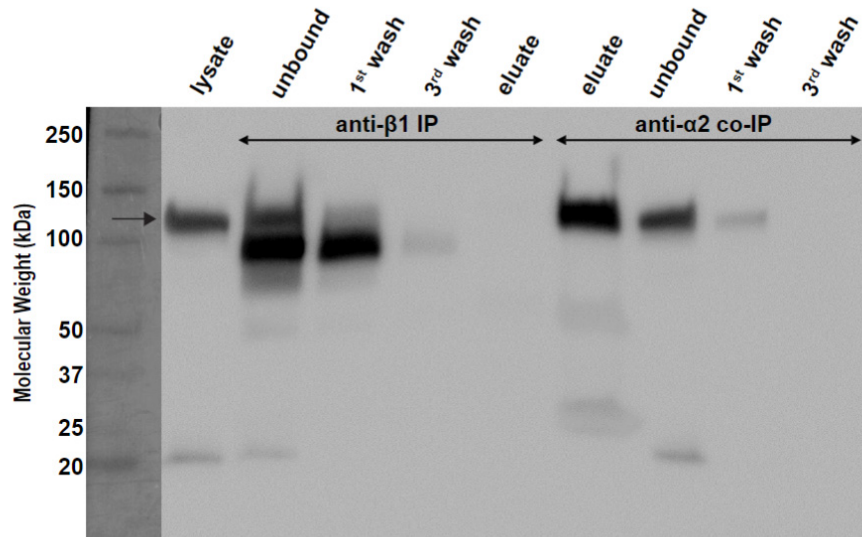

**Supplemental Figure 1.** Western blot analysis followed by chemiluminescent detection of integrin  $\beta 1$  using Immobilon Western Chemiluminescent HRP Substrate (Millipore Sigma, St. Louis, MO) and ImageQuant LAS 4000 camera system (GE Healthcare, Chicago, IL). The digital image was acquired in auto-exposure mode. Purified mouse anti-CD29 Clone 18/CD29 integrin  $\beta 1$  (BD Biosciences, San Jose, CA) was used as the primary antibody (1:2000) and anti-mouse IgG HRP-linked (Cell Signaling Technology, Danvers, MA 01923) was used as the secondary antibody (1:4000). Integrin  $\beta 1$  was isolated from MKs of wild type male mice by immunoprecipitation (IP) using TS2/16 anti- $\beta 1$  integrin conjugated to agarose beads or by co-immunoprecipitation using an anti- $\alpha 2$  integrin monoclonal antibody in solution. The lysate is represented, as well as post -IP and -co-IP unbound and wash fractions. A higher yield of integrin  $\beta 1$  was obtained by co-IP when the anti- $\alpha 2$  integrin mAb was being used and this immunoprecipitate was used for the nUPLC-MS/MS analyses. An arrow points to the molecular weight (approximately 130 kDa) of  $\beta 1$ .

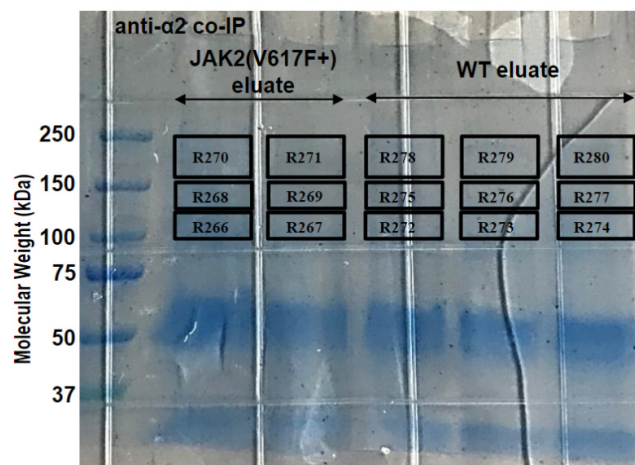

**Supplemental Figure 2:** SDS-PAGE gel stained with Coomassie blue showing integrin bands from proteins of wild type (WT) and JAK2(V617F+) male mice MKs isolated by co-IP using anti- $\alpha 2$  integrin monoclonal antibody in solution. Gel bands excised and individually submitted to proteolytic digestion followed by mass spectrometry analysis are indicated. For a given phenotype, peptides extracted from gel bands corresponding to approximately the same molecular weight regions were combined prior to further analysis, e.g., R266 and R267 for WT or R272, R273 and R274 for JAK2(V617F+). Gel bands situated at ~50 kDa and < 37 kDa correspond to anti- $\alpha 2$  integrin monoclonal antibody heavy and light chains, respectively.

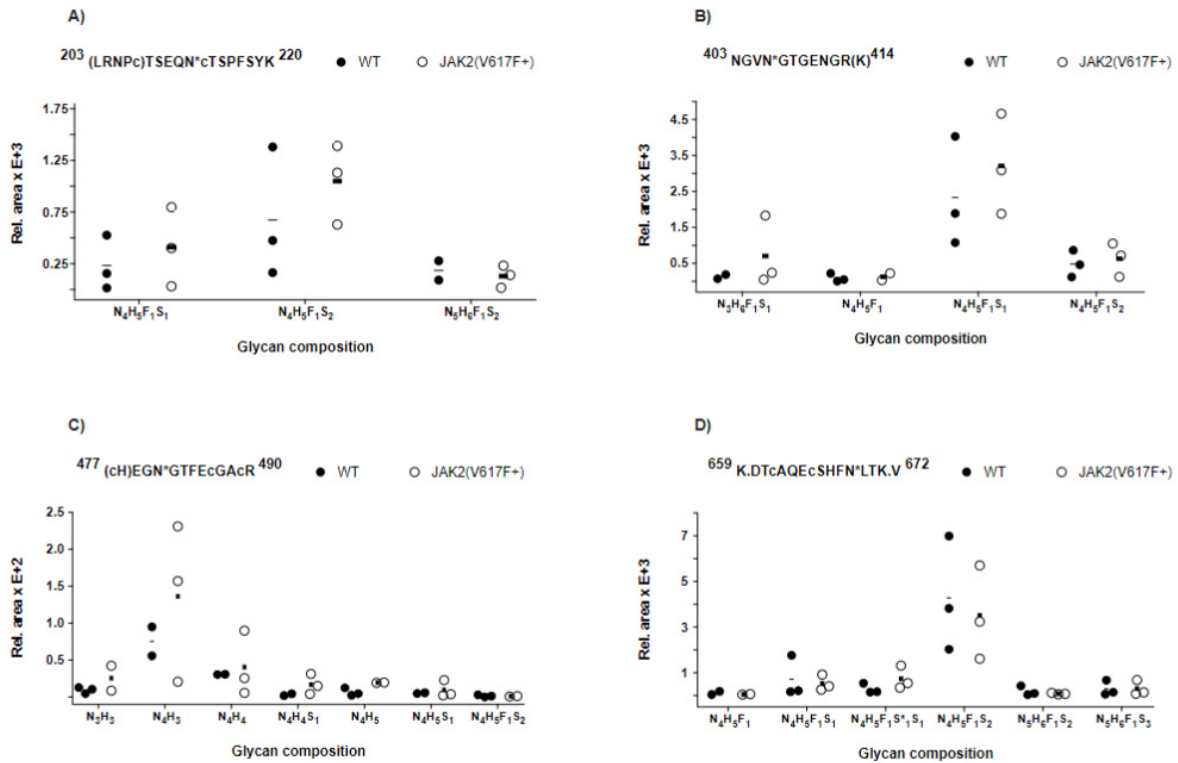

**Supplemental Figure 3:** N-glycan microheterogeneity at sites N212, N406, N481 and N669 of integrin  $\beta 1$  in megakaryocytes of wild type (WT) and JAK2(V617F+) 13- to 14-weeks-old male mice. The total signal corresponding to the sum of all glycoforms of the glycopeptides that span each N-linked site is normalized to the total ion current for each of the biological replicates. Each biological replicate is depicted as a single point, the mean is indicated by a dash (WT) or by a square [JAK2(V617F+)]. Sequence extensions for peptides resulting from alternative proteolytic cleavages detected around a given glycosite (N\*) are indicated in parenthesis. A) Glycopeptide <sup>203</sup>(LRNPc)TSEQN\*cTSPFSYK<sup>220</sup> at N212, B) Glycopeptide <sup>403</sup>NGVN\*GTGENGR(K)<sup>414</sup> at N406, C) glycopeptide <sup>477</sup>(cH)EGN\*GTFEcGAcR<sup>490</sup> at N481 and D) glycopeptide <sup>659</sup>DTcAQEcSHFN\*LTK<sup>672</sup> at N669. Abbreviations used are as follows: HexNAc, N, N-acetylhexosamine; NeuGc, S, N-glycolyl neuraminic acid; NeuAc, S\*, N-acetyl neuraminic acid; Hex, H, hexose; F, fucose (deoxyHex). Lower case c in a peptide sequence indicates a cysteine that has been modified by carboxymethylation prior to protease digestion

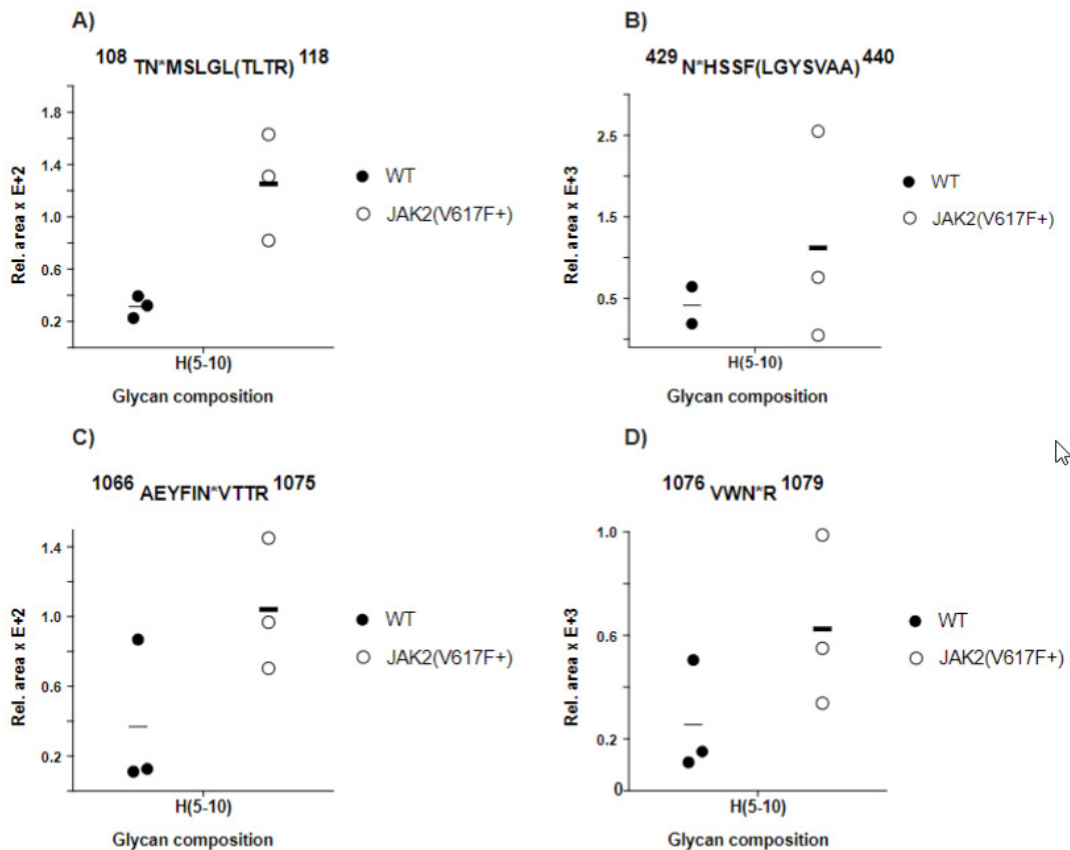

**Supplemental Figure 4:** Minimally processed (N2H5-10) glycopeptid forms at *N*-glycan sites N109, N429, N1071 and N1078 of integrin  $\alpha 2$  in megakaryocytes of wild type (WT) and JAK2(V617F+) male mice. The total signal corresponding to the sum of all glycoforms of the glycopeptides that span each *N*-linked site is normalized to the total ion current for each of the biological replicates. Each biological replicate is depicted as a single point, the mean is indicated by a dash (WT) or by a square [JAK2(V617F+)]. Alternative proteolytic cleavages detected around a given glycosite (N\*) are indicated in parenthesis. A) Glycopeptide  $^{108}\text{TN}^*\text{MSLGL}(\text{TLTR})^{118}$  at N109, B) Glycopeptide  $^{429}\text{N}^*\text{HSSF}(\text{LGYSVAA})^{440}$  at N429, C) glycopeptide  $^{1066}\text{AEYFIN}^*\text{VTTR}^{1075}$  at N1071 and D) glycopeptide  $^{1076}\text{VWN}^*\text{R}^{1079}$  at N1078. Abbreviations used are as follows: HexNAc, N, *N*-acetylhexosamine; NeuGc, S, *N*-glycolyl neuraminic acid; NeuAc, S\*, *N*-acetyl neuraminic acid; Hex, H, hexose; F, fucose (deoxyHex). Lower case c in a peptide sequence indicates a cysteine that has been modified by carboxymethylation prior to protease digestion.

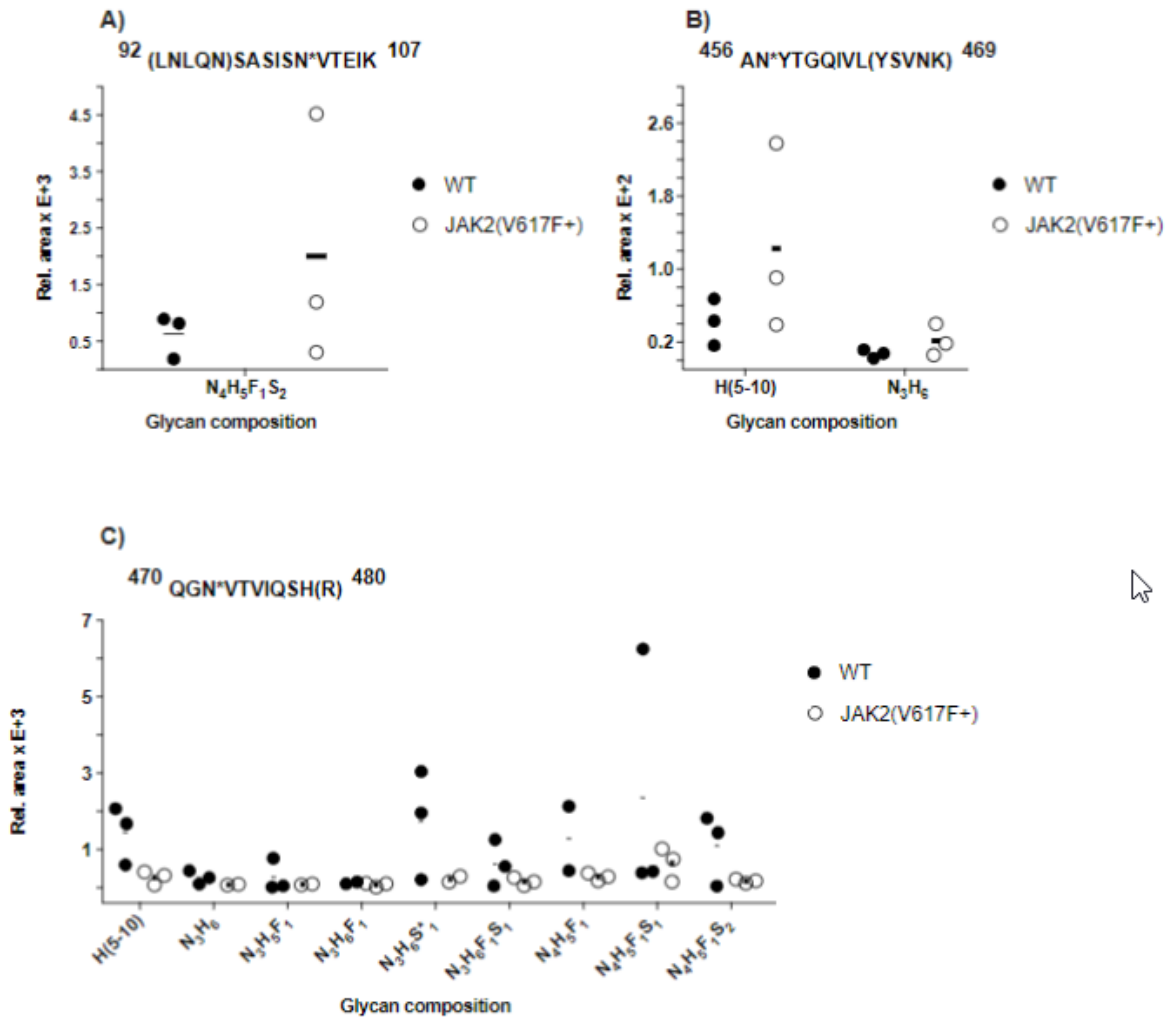

**Supplemental Figure 5:** More extensively processed glycopeptid forms at *N*-glycan sites N102, N457 and N472 of integrin  $\alpha 2$  in megakaryocytes of wild type (WT) and JAK2(V617F+) male mice. The total signal corresponding to the sum of all glycoforms of the glycopeptides that span each *N*-linked site is normalized to the total ion current for each of the biological replicates. Each biological replicate is depicted as a single point, the mean is indicated by a dash (WT) or by a square [JAK2(V617F+)]. Extensions of the peptide sequence due to alternative proteolytic cleavages detected around a given glycosite (N\*) are indicated in parenthesis. A) Glycopeptide  $^{92}$ (LNLQN)SASISN\*VTEIK $^{107}$  at N102, B) Glycopeptide  $^{456}$ AN\*YTGQIVL(YSV NK) $^{469}$  at N457 and C) glycopeptide  $^{470}$ QGN\*VTVIQSH(R) $^{480}$  at N472 Abbreviations used are as follows: HexNAc, N, *N*-acetylhexosamine; NeuGc, S, *N*-glycolyl neuraminic acid; NeuAc, S\*, *N*-acetyl neuraminic acid; Hex, H, hexose; F, fucose (deoxyHex). Lower case c in a peptide sequence indicates a cysteine that has been modified by carboxymethylation prior to protease digestion.

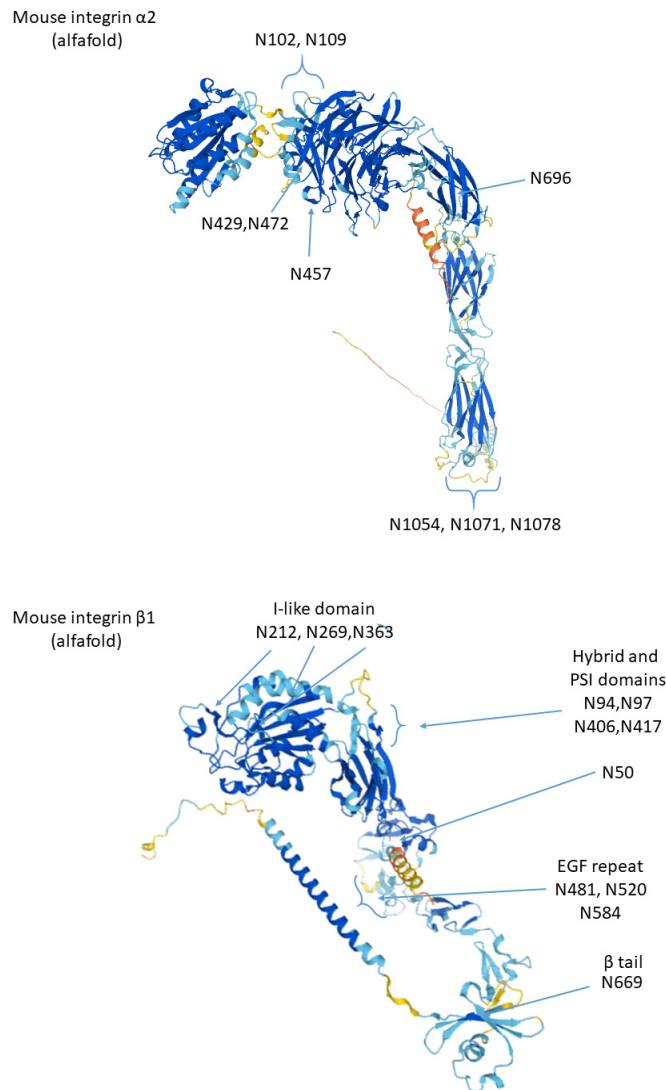

**Supplemental Figure 6:** Representation of integrin  $\alpha 2$  (top) and integrin  $\beta 1$  (bottom) structures into similar projections using AlphaFold program (AlphaFold Data Copyright (2021) DeepMind Technologies Limited [46]). Predicted structures generated by AlphaFold have been modified to indicate the potential *N*-linked glycosylation sites. Twelve integrin  $\beta 1$  potential *N*-glycosylation sites spanning all domains are represented: I-like (N212, N269 and N363), PSI and hybrid (N50, N94, N97, N406 and N417), membrane proximal (EGF repeat and  $\beta$ -tail, N481, N520, N584 and N669). For integrin  $\alpha 2$ , nine potential *N*-glycosylation sites are represented: situated on or in close proximity to the  $\beta$ -propeller domain repeat and I-domain (in contact with the ECM, N457, N102, N109, N429, N472 and N696) and on a region close to the transmembrane (N1054, N1071 and N1078).



## Supplemental Tables

**Supplemental Table 1.** For each phenotype, the sample was separated into three aliquots based on migration along an  $\alpha$ SDS-PAGE gel and each of the bands was subjected to in-gel proteolytic digestion (reported as upper and lower 100-150 kDa, 150-250 kDa. The peptide digests were analyzed by LC-MS/MS and the data sets were analyzed using Byonic version 3.8-11 software (Protein Metrics, Cupertino, CA).. Listed here are the glycopeptifforms assigned to mouse integrin  $\beta 1$ . **See the individual Excel file Table1\_MK\_ITB1.**

**Supplemental Table 2.** For each phenotype, the sample was separated into three aliquots based on migration along an SDS-PAGE gel and each of the bands was subjected to in-gel proteolytic digestion (reported as upper and lower 100-150 kDa, 150-250 kDa. The peptide digests were analyzed by LC-MS/MS and the data sets analyzed using Byonic version 3.8-11 software (Protein Metrics, Cupertino, CA). Listed here are the glycopeptifforms assigned to mouse integrin  $\alpha 2$ . **See the individual Excel file Table2\_MK\_ITA2\_UpLow100\_150gelband.**

| Collection date | Biological replicate | Total number of cells |             | Total amount of protein in MK lysate ( $\mu$ g) |             |
|-----------------|----------------------|-----------------------|-------------|-------------------------------------------------|-------------|
|                 |                      | WT                    | JAK2(V617F) | WT                                              | JAK2(V617F) |
| 2/14/2020       | #1                   | 3.08E+05              | 5.63E+05    | 1951.6                                          | 2073.5      |
| 6/16/2020       | #2                   | 4.25E+05              | 3.33E+05    | 1847.2                                          | 1428.1      |
| 10/26/2020      | #3                   | 1.80E+06              | 1.28E+06    | 2872.7                                          | 2886.5      |

**Supplemental Table 3.** Cell counts and total amount of protein measured for MK lysates in WT and JAK2<sup>V617F</sup> samples.

| Integrin $\alpha 2$                                                                          | Rel. area <sup>a,b</sup> |              | Integrin $\alpha 2$                                                                          | Rel. area <sup>a,b</sup> |              |
|----------------------------------------------------------------------------------------------|--------------------------|--------------|----------------------------------------------------------------------------------------------|--------------------------|--------------|
|                                                                                              | WT                       | JAK2(V617F+) |                                                                                              | WT                       | JAK2(V617F+) |
| <b>N109</b>                                                                                  |                          |              | <b>N472</b>                                                                                  |                          |              |
| HexNAc(2)Hex(5-10) [H(5-10)]                                                                 |                          |              | HexNAc(2)Hex(5-10) [H(5-10)]                                                                 |                          |              |
| K.TN*MSLGL.T                                                                                 | -                        | 3.99E-04     | K.QGN*VTVIQSHR.G                                                                             | 2.70E-04                 | 1.45E-03     |
| K.TN*mSLGLTLTR.N                                                                             | 3.14E-03                 | 1.24E-02     | HexNAc(3)Hex(6) [N <sub>3</sub> H <sub>6</sub> ]                                             |                          |              |
| <b>N429</b>                                                                                  |                          |              | K.QGN*VTVIQSHR.G                                                                             | 7.79E-05                 | 1.16E-04     |
| HexNAc(2)Hex(5-10) [H(5-10)]                                                                 |                          |              | HexNAc(3)Hex(5)Fuc(1) [N <sub>3</sub> H <sub>5</sub> F <sub>1</sub> ]                        |                          |              |
| R.N*HSSF.L                                                                                   | -                        | 3.56E-05     | K.QGN*VTVIQSHR.R                                                                             | -                        | 1.61E-05     |
| R.N*HSSFLGY.S                                                                                | 4.18E-04                 | 1.06E-03     | K.QGN*VTVIQSHR.G                                                                             | 8.77E-05                 | 4.08E-04     |
| R.N*HSSFLGYSVAA.I                                                                            | -                        | 1.43E-04     | HexNAc(3)Hex(6)Fuc(1) [N <sub>3</sub> H <sub>6</sub> F <sub>1</sub> ]                        |                          |              |
| <b>N1071</b>                                                                                 |                          |              | K.QGN*VTVIQSHR.G                                                                             | 7.77E-05                 | 1.29E-04     |
| HexNAc(2)Hex(5-10) [H(5-10)]                                                                 |                          |              | HexNAc(3)Hex(6)NeuAc(1) [N <sub>3</sub> H <sub>6</sub> S* <sub>1</sub> ]                     |                          |              |
| K.AEYFIN*VTTR.V                                                                              | 3.69E-03                 | 1.04E-02     | K.QGN*VTVIQSHR.G                                                                             | 2.26E-04                 | 1.74E-03     |
| <b>N1078</b>                                                                                 |                          |              | HexNAc(3)Hex(6)Fuc(1)NeuGc(1) [N <sub>3</sub> H <sub>6</sub> F <sub>1</sub> S <sub>1</sub> ] |                          |              |
| HexNAc(2)Hex(5-10) [H(5-10)]                                                                 |                          |              | K.QGN*VTVIQSHR.G                                                                             | 1.59E-04                 | 6.19E-04     |
| R.VWN*R.T                                                                                    | 2.55E-04                 | 6.26E-04     | HexNAc(4)Hex(5)Fuc(1) [N <sub>4</sub> H <sub>5</sub> F <sub>1</sub> ]                        |                          |              |
| <b>N102</b>                                                                                  |                          |              | K.QGN*VTVIQSHR.R                                                                             | -                        | 5.38E-05     |
| HexNAc(4)Hex(5)Fuc(1)NeuGc(2) [N <sub>4</sub> H <sub>5</sub> F <sub>1</sub> S <sub>2</sub> ] |                          |              | K.QGN*VTVIQSHR.G                                                                             | 2.83E-04                 | 1.24E-03     |
| K.LNLQNSASISN*VTEIK.T                                                                        | 6.06E-04                 | 1.74E-03     | HexNAc(4)Hex(5)Fuc(1)NeuGc(1) [N <sub>4</sub> H <sub>5</sub> F <sub>1</sub> S <sub>1</sub> ] |                          |              |
| N.SASISN*VTEIK.T                                                                             | 7.19E-05                 | 4.01E-04     | K.QGN*VTVIQSHR.R                                                                             | -                        | 7.39E-05     |
| <b>N457</b>                                                                                  |                          |              | K.QGN*VTVIQSHR.G                                                                             | 6.40E-04                 | 2.33E-03     |
| HexNAc(2)Hex(5-10) [H(5-10)]                                                                 |                          |              | HexNAc(4)Hex(5)Fuc(1)NeuGc(2) [N <sub>4</sub> H <sub>5</sub> F <sub>1</sub> S <sub>2</sub> ] |                          |              |
| R.AN*YTGQIVL.Y                                                                               | -                        | 3.89E-04     | K.QGN*VTVIQSHR.G                                                                             | 1.76E-04                 | 1.10E-03     |
| R.AN*YTGQIVLY.S                                                                              | 9.14E-04                 | 1.08E-03     |                                                                                              |                          |              |
| R.AN*YTGQIVLYSVNK.Q                                                                          | 3.62E-03                 | 1.14E-02     |                                                                                              |                          |              |
| HexNAc(3)Hex(6) [N <sub>3</sub> H <sub>6</sub> ]                                             |                          |              |                                                                                              |                          |              |
| R.AN*YTGQIVLY.S                                                                              | 4.52E-05                 | 4.04E-04     |                                                                                              |                          |              |
| R.AN*YTGQIVLYSVNK.Q                                                                          | 7.04E-04                 | 2.01E-03     |                                                                                              |                          |              |

<sup>(a)</sup> Peptide sequences - including sequences resulting from alternative proteolytic cleavage - covering N-glycosylation sites N109, N429, N1071, N1078, N102, N457 and N472 are indicated. Lower case m in peptide sequence indicates an oxidized methionine residue. Abbreviations used are as follows: HexNAc, N for N-acetylhexosamine; NeuGc, S for N-glycolyl neuraminic acid; NeuAc, S\*, N-acetyl neuraminic acid; Hex, H for hexose; F for fucose (deoxyHex).

<sup>(b)</sup> Average relative area of characterized glycopeptidofoms characterized in at least two out of the three biological replicates.

**Supplemental Table 4.** Average relative area of described glycopeptidofoms characterized in at least two out of the three biological replicates that span N-linked glycosylation sites N109, N429, N1071, N1078, N102, N457 and N472 of integrin  $\alpha 2$  isolated from MKs derived from 13- to 14- weeks-old male wild type (WT) and JAK2(V617F+) mice. Peptide sequences - including sequences resulting from alternative proteolytic cleavage - covering N-glycosylation sites N109, N429, N1071, N1078, N102, N457 and N472 are indicated. Lower case m in peptide sequence indicates an oxidized methionine residue. Abbreviations used are as follows: HexNAc, N for N-acetylhexosamine; NeuGc, S for N-glycolyl neuraminic acid; NeuAc, S\*, N-acetyl neuraminic acid; Hex, H for hexose; F for fucose (deoxyHex).

**Supplemental Table 5:** Protein identifications obtained using Peaks Studio X+ software (Bioinformatics Solutions Inc., Waterloo, Canada) for analysis of the data obtained for co-IP proteins in SDS-PAGE gel bands situated between 100 kDa and 250 kDa. **See individual Excel File Table5\_Co-IP proteins**
